# Supplementary figures and images for: 2-Fluorofucose Attenuates Hydrogen Peroxide-Induced Oxidative Stress in HepG2 Cells via Nrf2/keap1 and NF-κB Signaling Pathways
Source: MDPI journal article supplement (doi:10.3390/life12030406), 2022-03-11

Figure S1

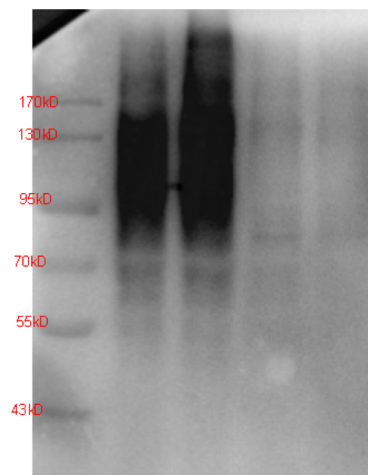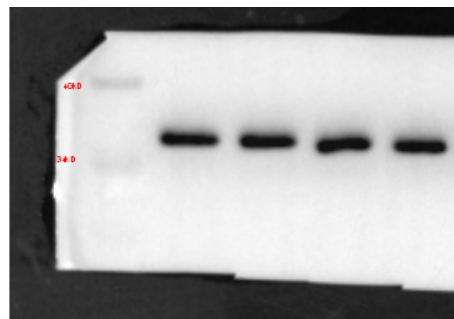

Figure S2

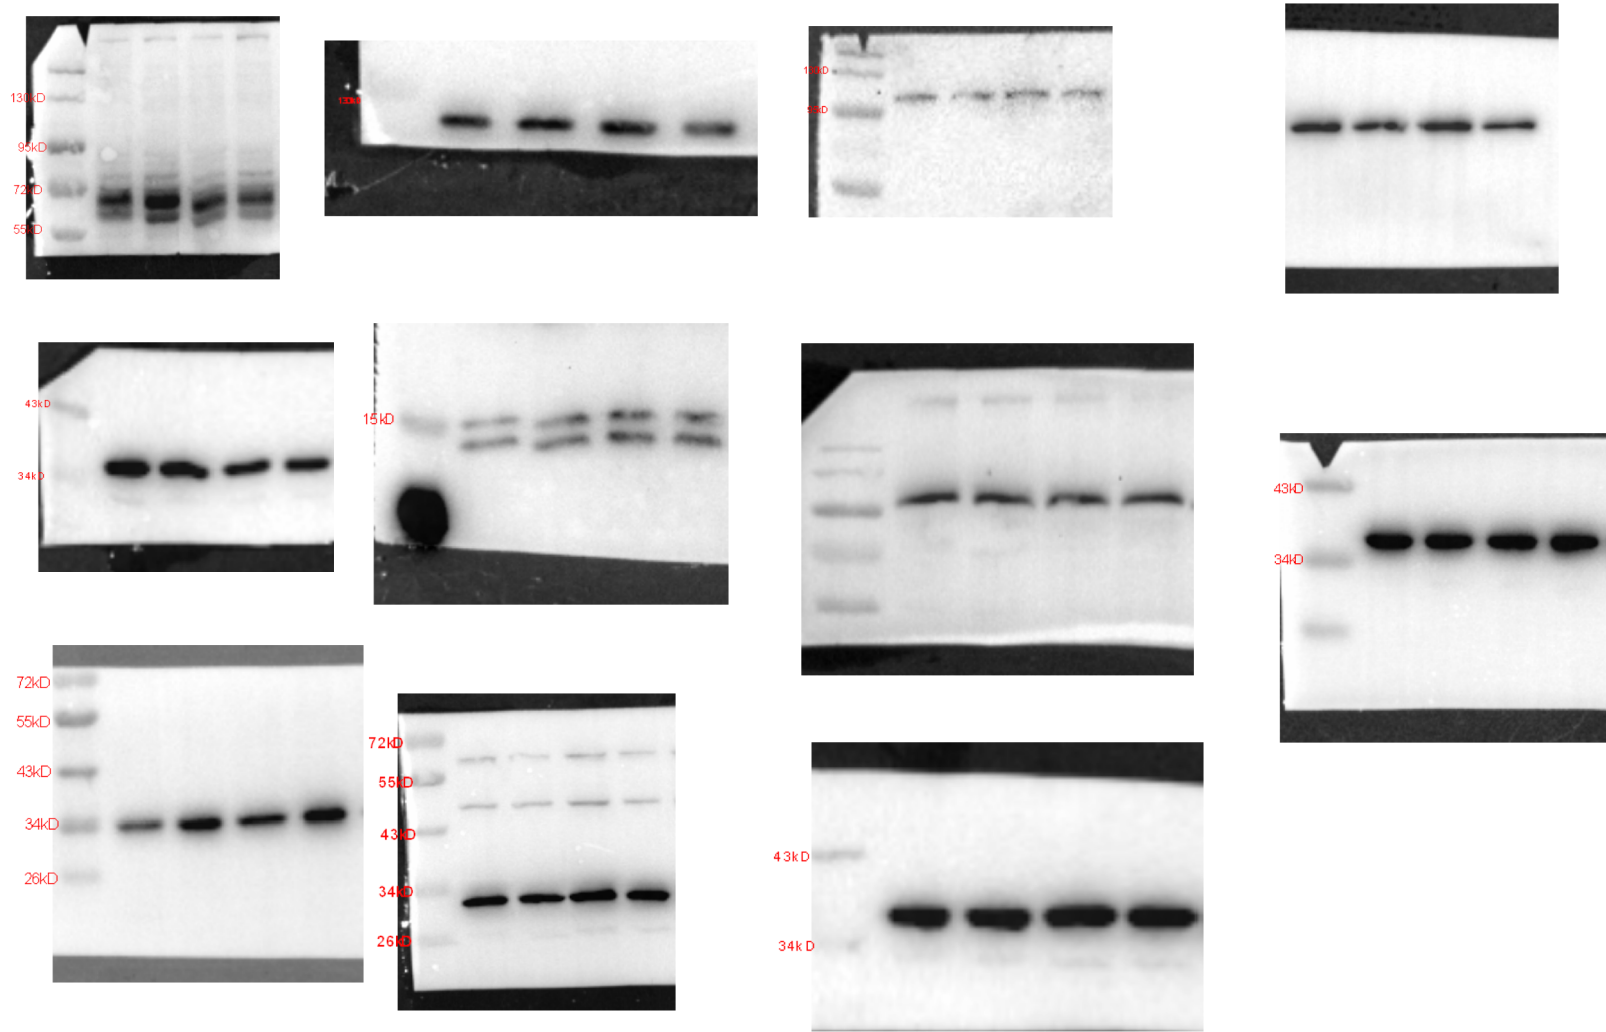

Figure S3

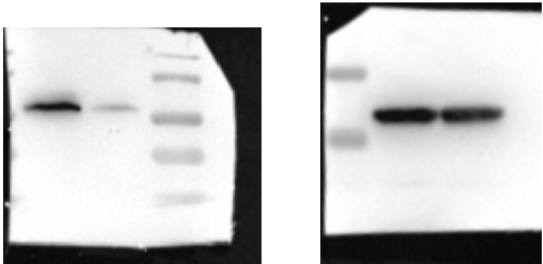

Figure S4

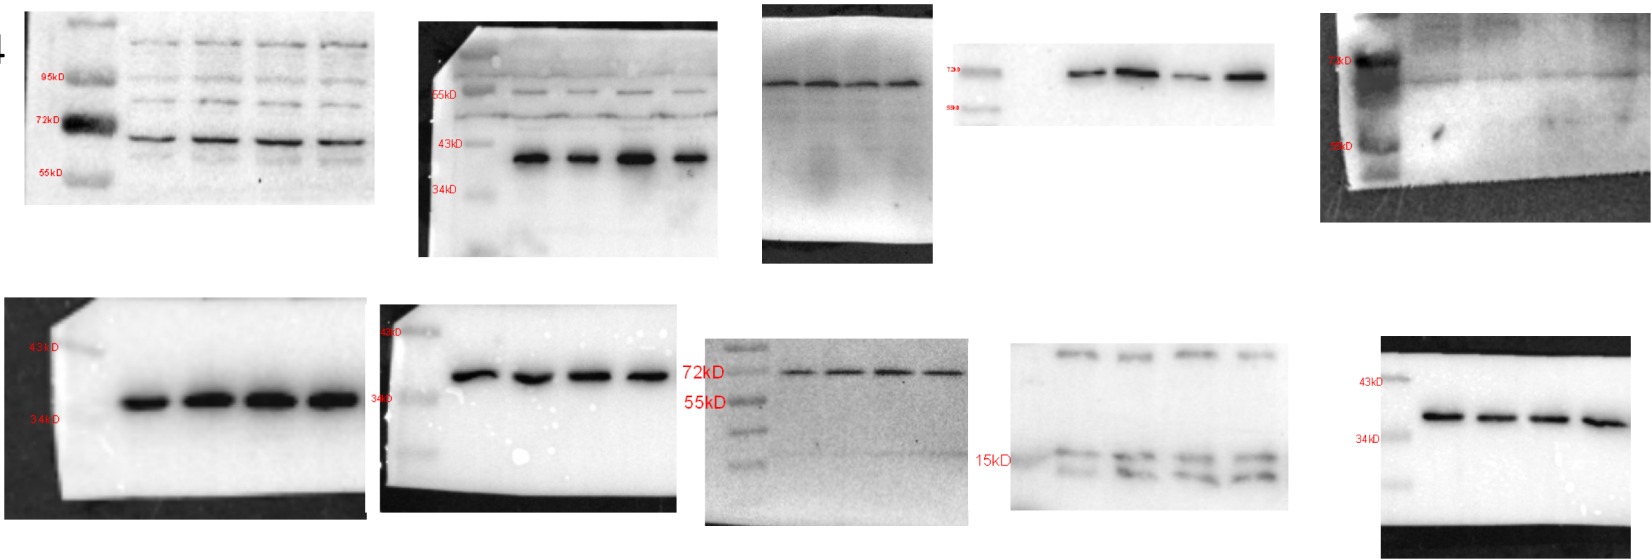

Supplement: s1 [file s1]
